# Supplementary material for: Silicon surface patterning via galvanic microcontact imprinting lithography
Source: Royal Society of Chemistry journal article supplement (doi:10.1039/d1ra02459k), 2021-01-01
Supplement: d1ra02459k1.pdf [file d1ra02459k1.pdf]

## Supplementary Materials for Silicon Surface Patterning via Galvanic Microcontact Imprinting Lithography

Fuqiang Zhang, Haoxin Fu, Kui-Qing Peng\*

Department of Physics and Beijing Key Laboratory of Energy Conversion and Storage Materials,  
Beijing Normal University, Beijing, China

\* To whom correspondence should be addressed. E-mail: kq\_peng@bnu.edu.cn.

### Supplementary Figures

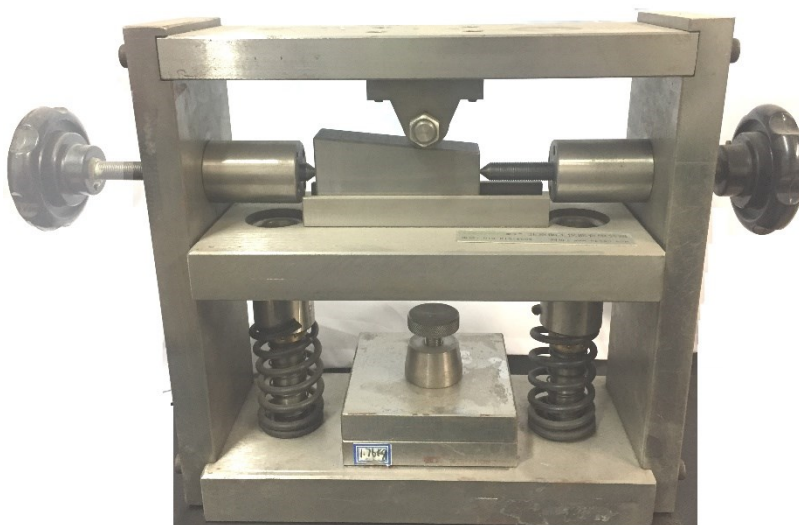

**Fig. S1.** The photogram image of the custom-built hydrostatic pressure device.

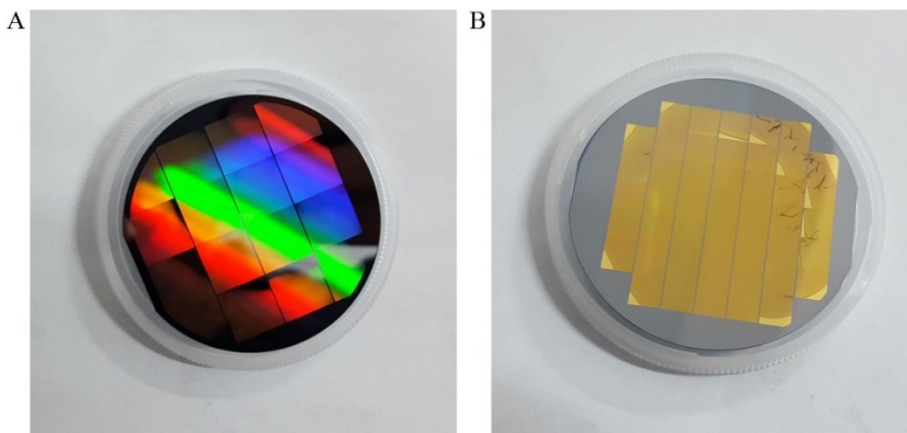

**Fig. S2.** The photogram images of gold pillar (A) and grating (B) moulds prepared on silicon wafers.

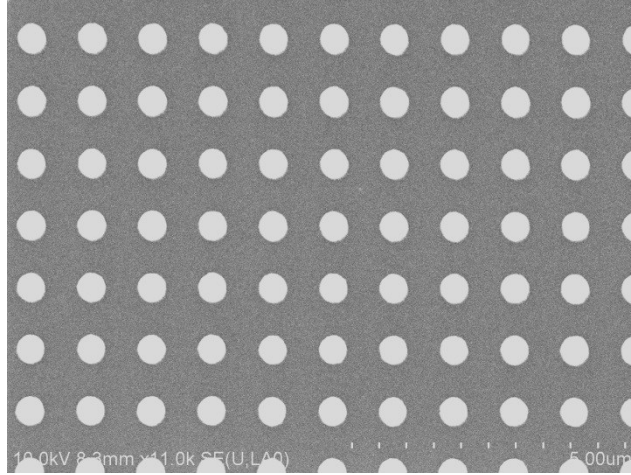

**Fig. S3.** SEM image of the gold pillar mould after more than 10 times GML use, showing no observable damage.

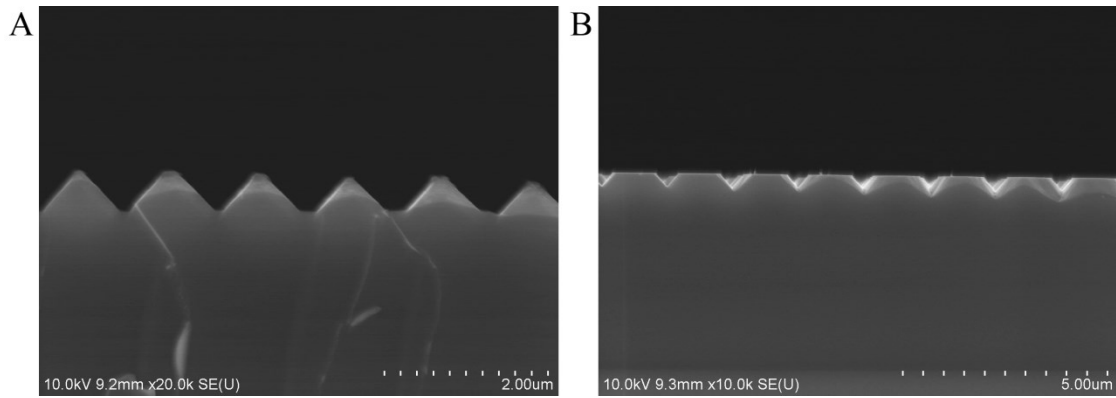

**Fig. S4.** The cross-sectional SEM images of upright (A) and inverted (B) silicon pyramids prepared by GML process and wet etching in KOH solution.
